# Supplementary material for: CMG helicase disassembly is controlled by replication fork DNA, replisome components and a ubiquitin threshold
Source: eLife journal article supplement (doi:10.7554/elife.60371), 2020-08-17
Supplement: supp [file elife_poa_e60371_Supplementary_file_2.docx]

**Supplementary File 2. Protein expression plasmids generated in this study.**

Codon usage of genes in pTDK3 and pTDK6 was optimised for protein expression in *S. cerevisiae* as described previously (Yeeles et al., 2015).

| **Plasmid** | **Original vector** | **Insert** | **Plasmid construction** |
| --- | --- | --- | --- |
| pTDK3 | pRS306 | *SKP1-GAL1,10-ProteinA-3TEV-DIA2* | Synthetic construct cloned 5’ SacI, 3’ XmaI |
| pTDK6 | pRS305 | *HRT1-GAL1,10-CDC53* | Synthetic construct cloned 5’ SacI, 3’ XmaI |
| pTDK7 | pET28c | *CDC34* | PCR using oligonucleotides 6664 and 6665 |
| pTDK35 | pK27SUMO | *OTU1* | PCR using oligonucleotides 8302 and 8303 |
